# Supplementary material
Source: MDPI journal article supplement (https://www.mdpi.com/2073-4441/14/16/2579)
Supplement: s1 [file s1]

## Supplementary materials

Section 1 includes the figures showing the time series of  $H_s$ ,  $z$ ,  $V_w$  and  $D_w$  during the ten analyzed events: six Mo.S.E. operations and four ordinary events. Section 2 presents the  $H_s$  numerical results for the ten events carried out with the SWAN model mapped for the whole lagoon (main model grid).

### 1. Analyzed storm events

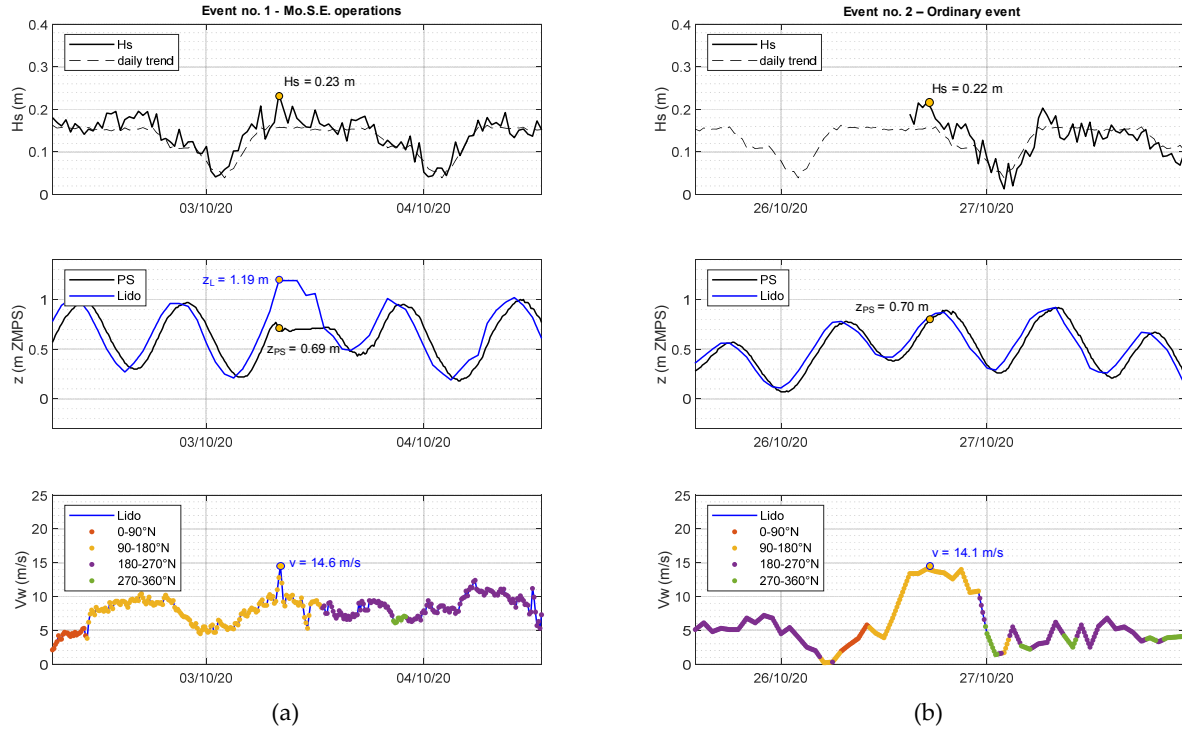

**Figure S1** Time series of  $H_s$ , sea levels ( $z$ ) at the Punta della Salute gauge and at the Lido inlet and wind intensity ( $V_w$ ) with information also on wind direction ( $D_w$ ): (a) during a Mo.S.E. closure, October 3<sup>rd</sup>, 2020, and (b) an ordinary event, October 26<sup>th</sup>, 2020.

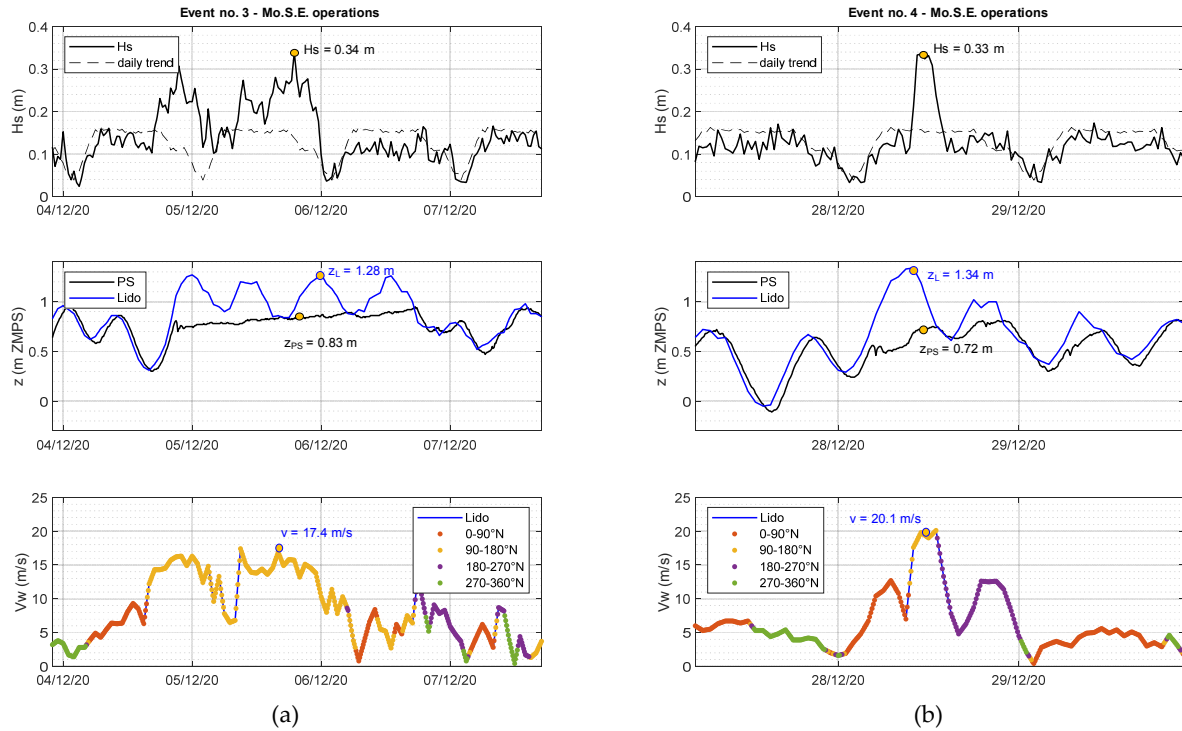

**Figure S2** Time series of  $H_s$ , sea levels ( $z$ ) at the Punta della Salute gauge and at the Lido inlet and wind intensity ( $V_w$ ) with information also on wind direction ( $D_w$ ): (a) during a Mo.S.E. closure, December 5<sup>th</sup>, 2020, and (b) a Mo.S.E. closure, December 28<sup>th</sup>, 2020.

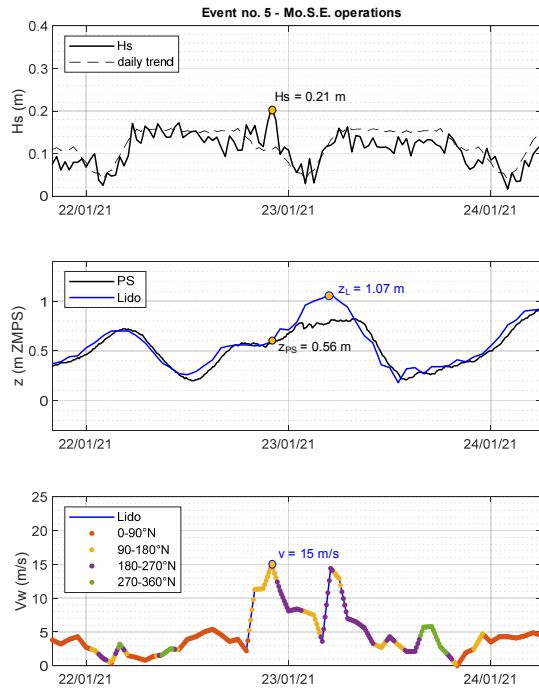

(a)

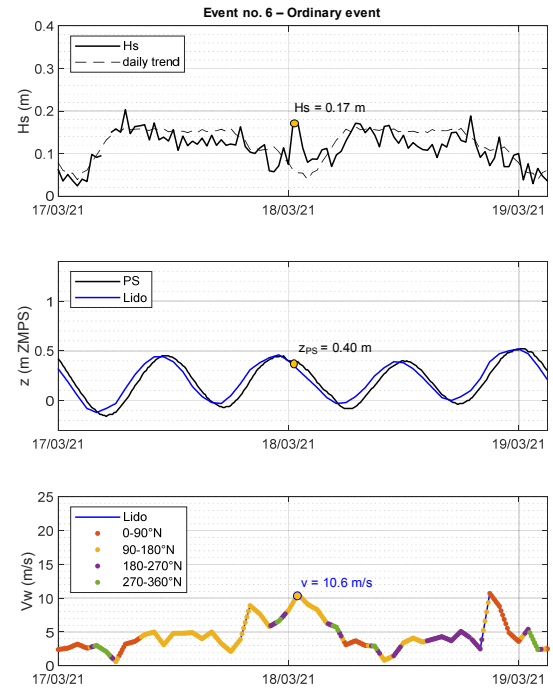

(b)

**Figure S3** Time series of  $H_s$ , sea levels ( $z$ ) at the Punta della Salute gauge and at the Lido inlet and wind intensity ( $V_w$ ) with information also on wind direction ( $D_w$ ): (a) during a Mo.S.E. closure, January 22<sup>th</sup>, 2021, and (b) an ordinary event, March 18<sup>th</sup>, 2021.

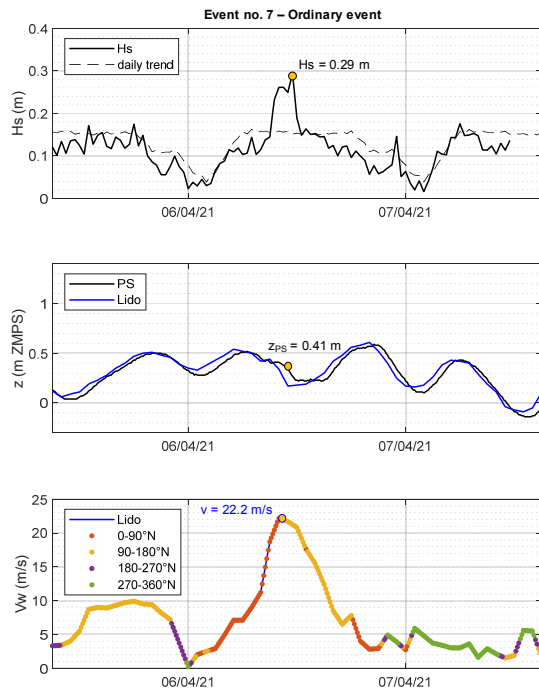

(a)

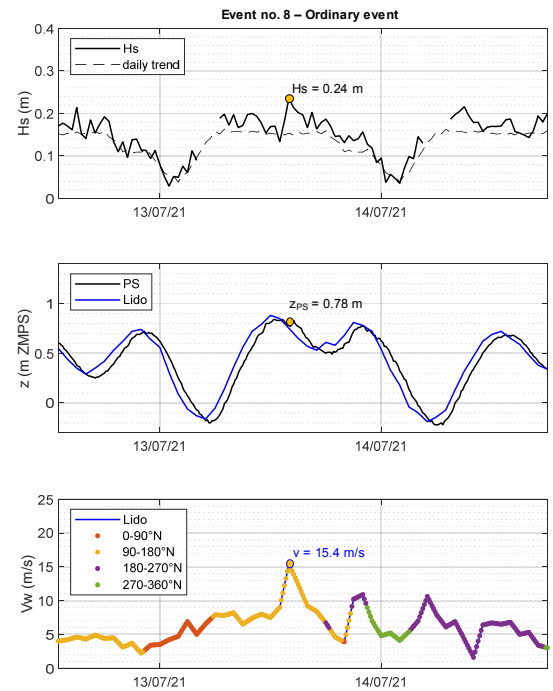

(b)

**Figure S4** Time series of  $H_s$ , sea levels ( $z$ ) at the Punta della Salute gauge and at the Lido inlet and wind intensity ( $V_w$ ) with information also on wind direction ( $D_w$ ): (a) during an ordinary event, April 6<sup>th</sup>, 2021, and (b) an ordinary event, July 13<sup>th</sup>, 2021.

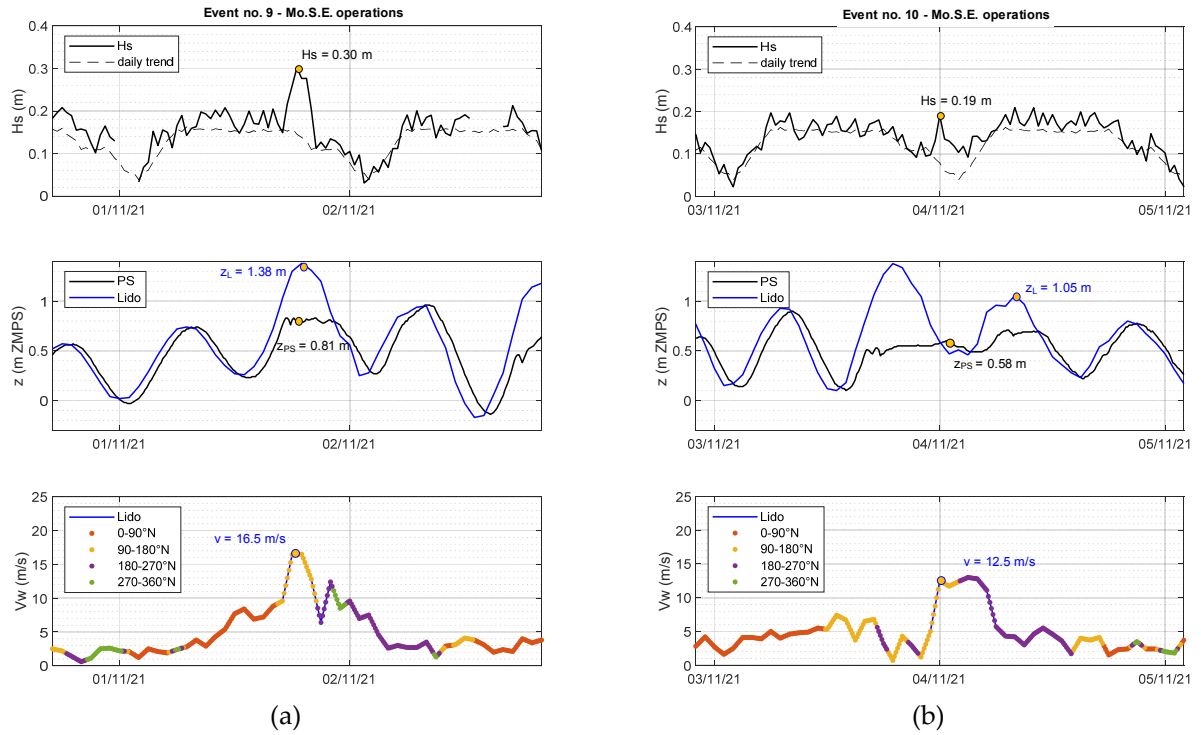

**Figure S5** Time series of  $H_s$ , sea levels ( $z$ ) at the Punta della Salute gauge and at the Lido inlet and wind intensity ( $V_w$ ) with information also on wind direction ( $D_w$ ): (a) during a Mo.S.E. closure, November 1<sup>st</sup>, 2021, and (b) a Mo.S.E. closure, November 4<sup>th</sup>, 2021.

## 2. Numerical results

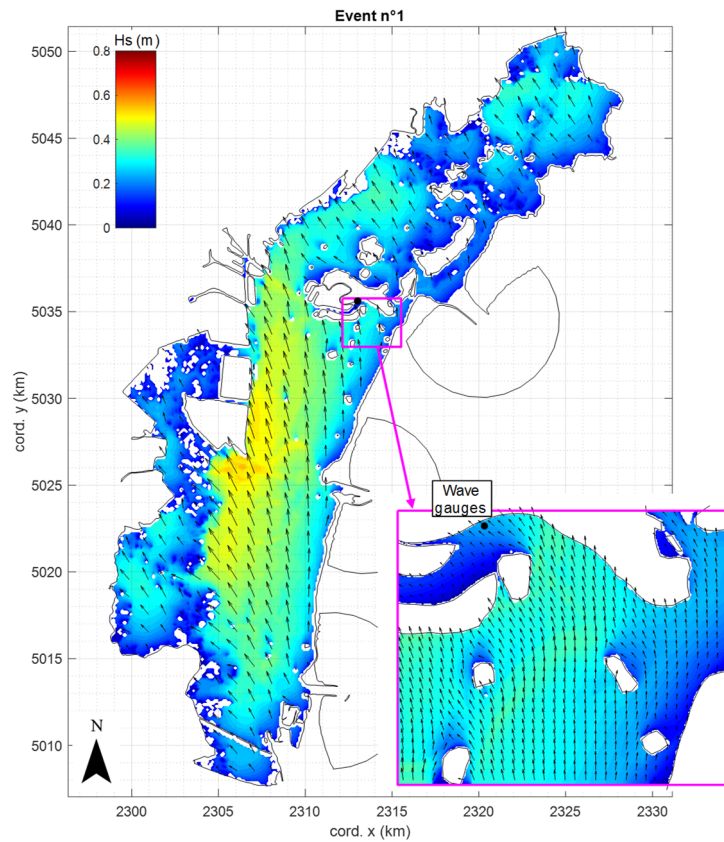

**Figure S6** Numerical model results for event no. 1. Mo.S.E. operations, October 3<sup>rd</sup>, 2020

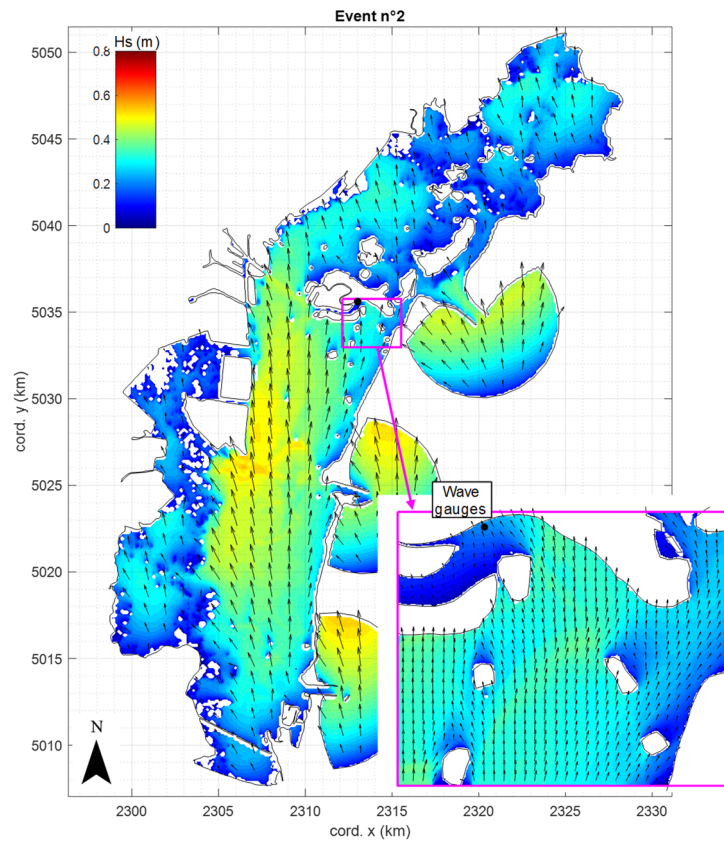

**Figure S7** Numerical model results for event no. 2. ordinary event, October 26<sup>th</sup>, 2020

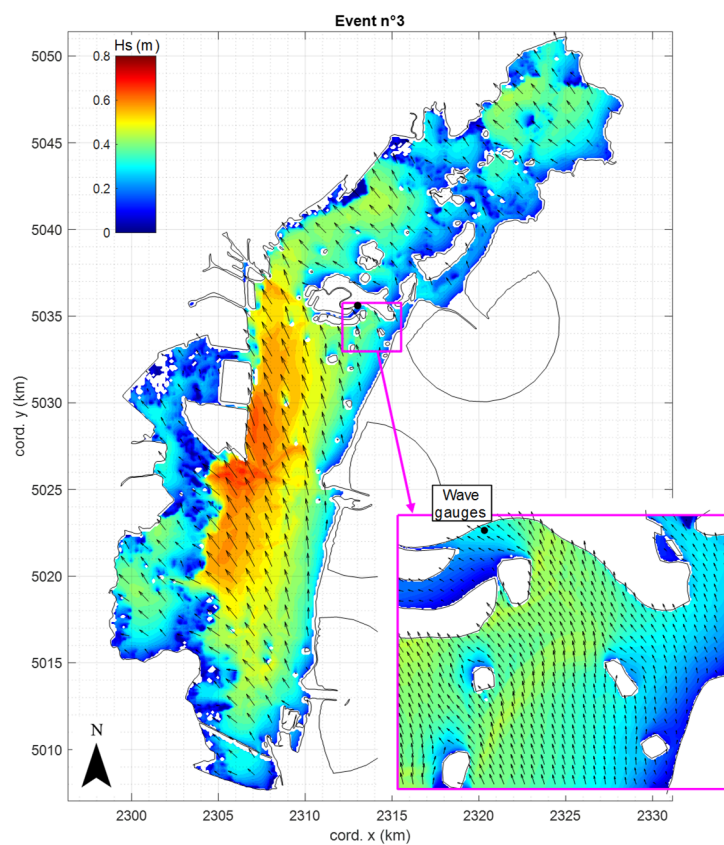

**Figure S8** Numerical model results for event no. 3. Mo.S.E. operations, December 5<sup>th</sup>, 2020



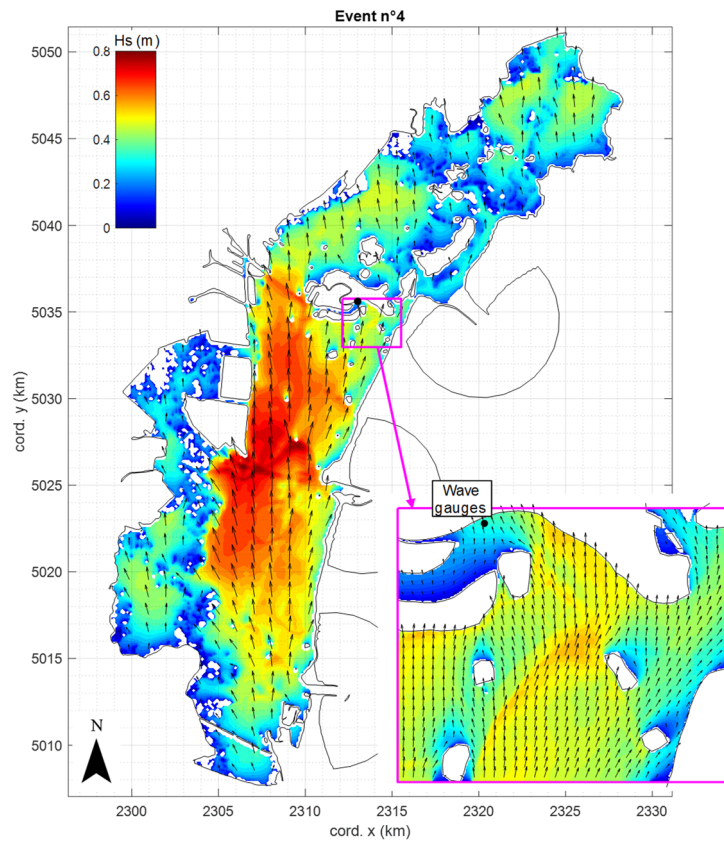

**Figure S9** Numerical model results for event no. 4. Mo.S.E. operations, December 28<sup>th</sup>, 2020

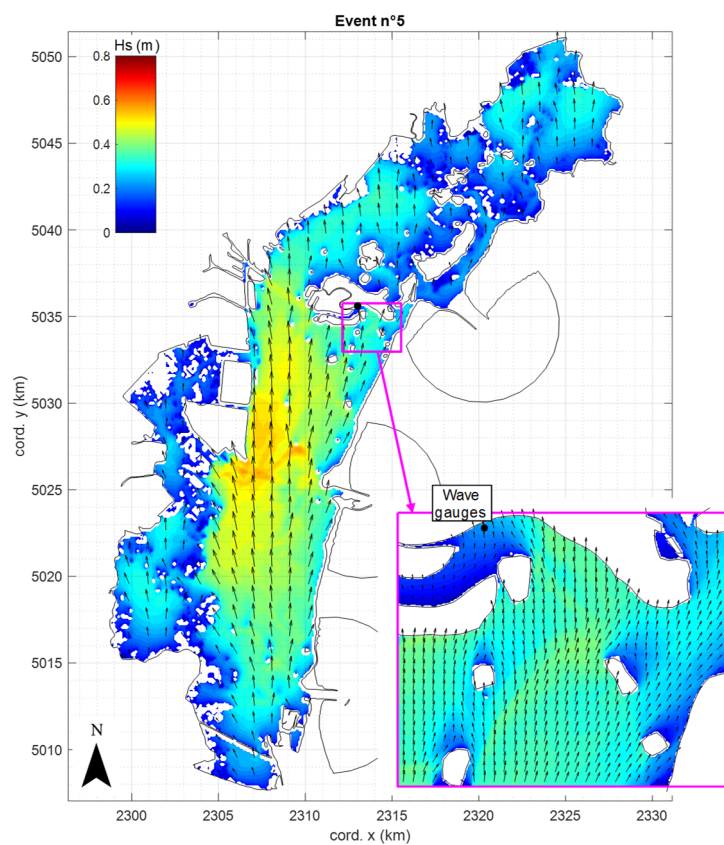

**Figure S10** Numerical model results for event no. 5. Mo.S.E. operations, January 22<sup>th</sup>, 2021

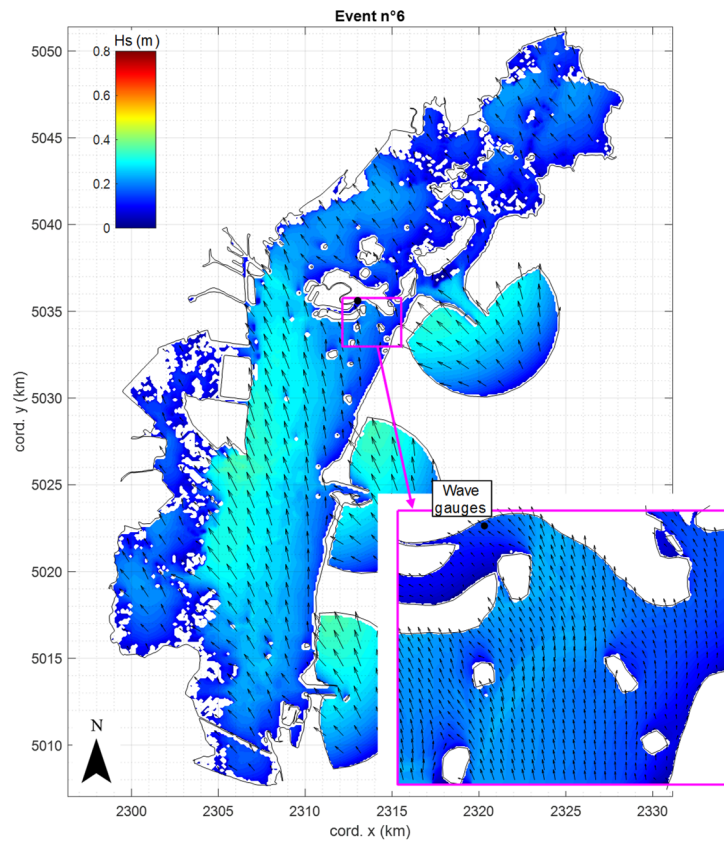

**Figure S11** Numerical model results for event no. 6. ordinary event, March 18<sup>th</sup>, 2021.

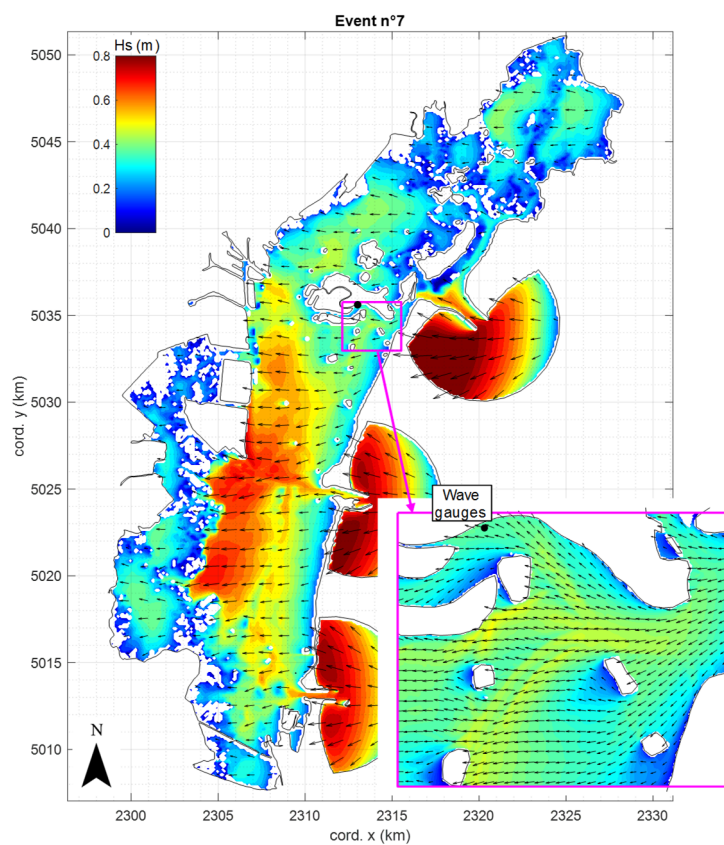

**Figure S12** Numerical model results for event no. 7. ordinary event, April 6<sup>th</sup>, 2021

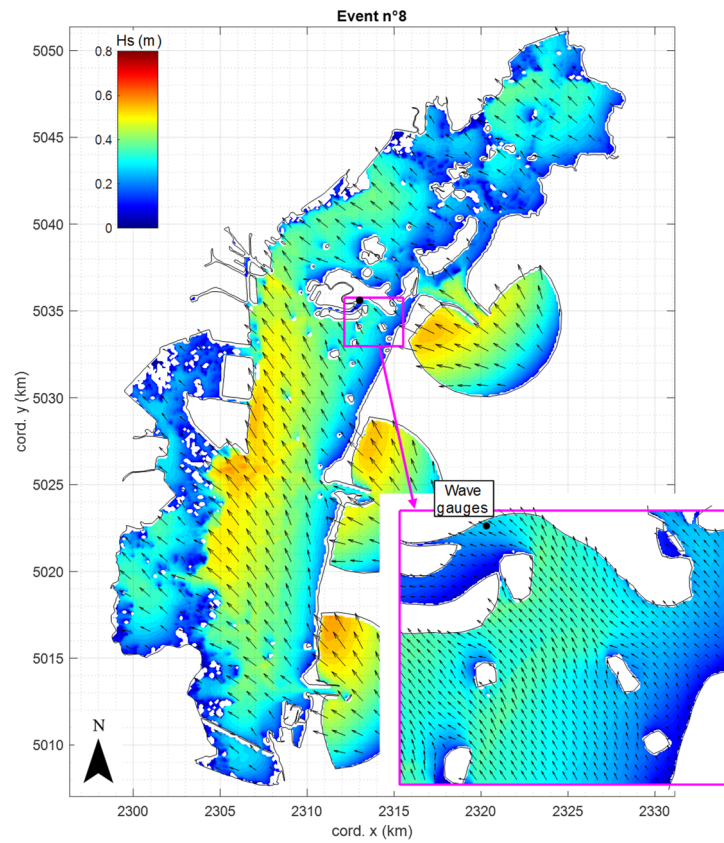

**Figure S13** Numerical model results for event no. 8. ordinary event, July 13<sup>th</sup>, 2021.

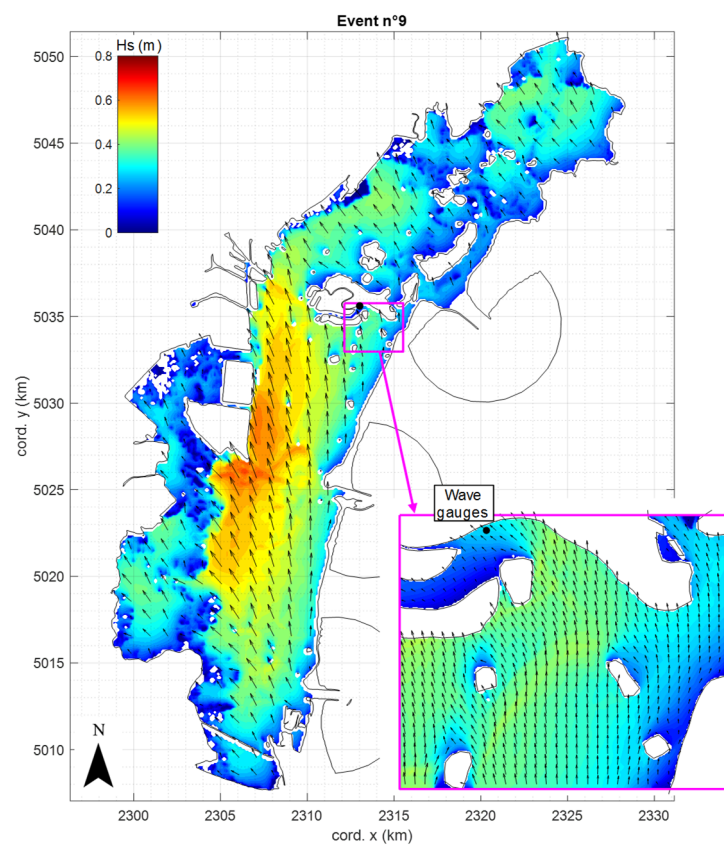

**Figure S14** Numerical model results for event no. 9. Mo.S.E. operations, November 1<sup>st</sup>, 2021

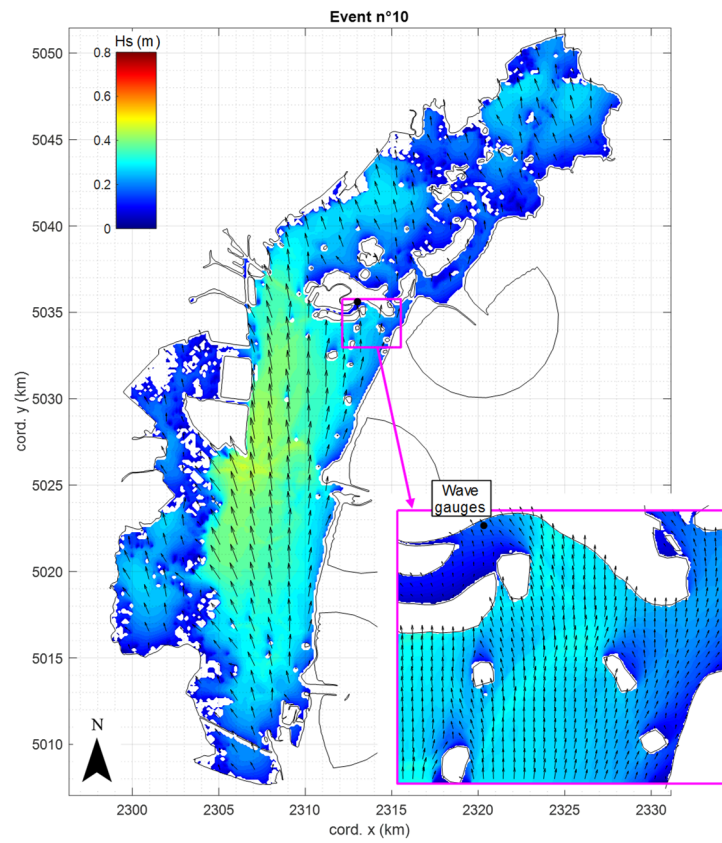

**Figure S15** Numerical model results for event no. 10. Mo.S.E. operations, November 4<sup>th</sup>, 2021.
